# Supplementary material for: Bacteria repelling poly(methylmethacrylate-co-dimethylacrylamide) coatings for biomedical devices
Source: Royal Society of Chemistry journal article supplement (doi:10.1039/c4tb01129e), 2014-01-01
Supplement: c4tb01129e1.pdf [file c4tb01129e1.pdf]

## Electronic Supplementary Information

### **Bacteria Repelling Poly(methylmethacrylate-*co*-dimethylacrylamide) Coatings for Biomedical Devices**

Seshasailam Venkateswaran,<sup>a‡</sup> Mei Wu,<sup>a‡</sup> Peter J. Gwynne,<sup>b</sup> Ailsa Hardman,<sup>b</sup> Annamaria Lilienkampf,<sup>a</sup> Salvatore Pernagallo,<sup>a</sup> Garry Blakely,<sup>b</sup> David G. Swann,<sup>c</sup> Maurice P. Gallagher,<sup>b\*</sup> Mark Bradley<sup>a\*</sup>

<sup>a</sup>School of Chemistry, EaStCHEM, and <sup>b</sup>School of Biological Science, King's Buildings, West Mains Road, University of Edinburgh, Edinburgh, EH9 3JJ, UK. <sup>c</sup>Critical Care, NHS Lothian, Royal Infirmary of Edinburgh, 51 Little France Crescent, Edinburgh EH16 4SA, UK, <sup>‡</sup>Equal contribution, \* mark.bradley@ed.ac.uk, mp.gallagher@ed.ac.uk

#### **Table of Content**

|                                                                              |            |
|------------------------------------------------------------------------------|------------|
| <b>1. Screening for bacteria repellent substrates on polymer microarrays</b> | <b>S3</b>  |
| 1.1. Bacteria culture for microarray screening                               | S3         |
| 1.2. Bacterial adhesion on the microarrays                                   | S4         |
| 1.3. Analysis of bacterial attachment                                        | S4         |
| <b>2. Scale-up and validation of 'hit' polymers</b>                          | <b>S12</b> |
| <b>3. Coating of catheters</b>                                               | <b>S14</b> |
| 3.1 Polymer synthesis and characterisation                                   | S14        |
| 3.2 Stability and solubility of catheters in organic solvents                | S15        |
| 3.3. Polymer coating thickness on the catheters                              | S16        |
| <b>4. Bacteria binding studies on coated catheters Cath-1 and Cath-2</b>     | <b>S17</b> |
| 4.1 Confocal microscopy and image analysis                                   | S17        |
| 4.2. SEM images of Cath-1–PA13                                               | S17        |
| <b>5. References</b>                                                         | <b>S18</b> |

## Figures

|                                                                                            |     |
|--------------------------------------------------------------------------------------------|-----|
| <b>Fig S1</b> Images of <i>C jejuni</i> 11168 attachment on polymer features               | S5  |
| <b>Fig S2</b> Images of <i>C jejuni</i> CH4 attachment on polymer features                 | S5  |
| <b>Fig S3</b> Images of <i>C perfringens</i> attachment on polymer features                | S6  |
| <b>Fig S4</b> Images of <i>C difficile</i> attachment on polymer features                  | S6  |
| <b>Fig S5</b> Images of <i>S mutans</i> attachment on polymer features                     | S7  |
| <b>Fig S6</b> Images of BacMix-1 attachment on polymer features                            | S7  |
| <b>Fig S7</b> Images of BacMix-2 attachment on polymer features                            | S8  |
| <b>Fig S8</b> Polymers showing low binding of bacteria                                     | S9  |
| <b>Fig S9</b> SEM images of the coated/uncoated coverslips after incubation with BacMix-1  | S13 |
| <b>Fig S10</b> SEM images of the coated/uncoated coverslips after incubation with BacMix-2 | S13 |
| <b>Fig S11</b> FTIR spectra of the hit polymers and the control                            | S15 |
| <b>Fig S12</b> Catheters in organic solvents                                               | S16 |
| <b>Fig S13</b> SEM images of coated catheters                                              | S16 |
| <b>Fig S14</b> SEM images of <b>Cath-1–PA13</b>                                            | S17 |

## Tables

|                                                                                    |     |
|------------------------------------------------------------------------------------|-----|
| <b>Table S1</b> Analysis of bacterial adhesion on ‘hit’ polymers                   | S10 |
| <b>Table S2</b> Monomer composition of the ‘hit’ bacteria non-binding polymers     | S11 |
| <b>Table S3</b> Post-polymerisation functionalisation of polyacrylates/acrylamides | S12 |
| <b>Table S4</b> Synthesis of <b>PA13</b> , <b>PA515</b> and <b>PA155</b>           | S14 |
| <b>Table S5</b> Molecular weight and polydispersity index of the polymers          | S14 |



## 1. Screening for bacteria repellent substrates on polymer microarrays

Polymer microarrays were fabricated by contact printing of preformed polymers as reported previously.<sup>1,2,3</sup>

### 1.1. Bacteria culture for microarray screening

*Clostridium* strains were cultured in an anaerobic environment (80% N<sub>2</sub>, 10% CO<sub>2</sub>, 10% H<sub>2</sub>) at 37 °C. All other strains were cultured in a microaerobic environment (85% N<sub>2</sub>, 10% CO<sub>2</sub>, 5% O<sub>2</sub>) at 37 °C.

*Clostridium perfringens* and *Clostridium difficile*

*C. perfringens* (NCTC 8257) and *C. difficile* (NCTC 630) were grown in brain-heart infusion (BHI) supplemented with L-cysteine (0.5 mg/mL), sodium bicarbonate (1 mg/mL), anhemine (5 mg/L) and menadione (0.5 mg/L).

*Campylobacter jejuni*

*C. jejuni* strains CH4 and NCTC 11168 were cultured in Brucella broth, supplemented with *Campylobacter* growth supplement (FBP) consisting of iron (II) sulphate (0.15 mg/mL), sodium pyruvate (0.15 mg/mL), sodium metabisulphite (0.15 mg/mL), vancomycin (2500 U/L) and trimethoprim (5 mg/L).

*Streptococcus mutans*

*S. mutans* (NCTC 10923) was grown in Luria–Bertani (LB) broth.

**Bacteria mixtures.** The strains used in BacMix-1 and BacMix-2 were isolated from endotracheal tubes from ICU patients and genotyped by PCR analysis. BacMix-1 consisted of *Klebsiella pneumoniae* (*K. pneumoniae*), *Staphylococcus saprophyticus* (*S. saprophyticus*), and *Staphylococcus aureus* (*S. aureus*), which were all grown in LB broth. BacMix-2 consisted of *Streptococcus mutans* (*S. mutans*), *S. aureus*, *K. pneumoniae* and *Enterococcus faecalis* (*E. faecalis*), which were grown in brain-heart infusion (BHI).

## 1.2. Bacterial adhesion on the microarrays

For the microarray experiments, each bacterial strain was grown in 5 mL of the appropriate medium (see above, section 1.1) and incubated at 37 °C overnight with shaking to a constant density. For experiments with a single bacteria strain, 2 mL of each culture was collected by centrifugation (6000 rpm, 3 min), washed, resuspended in 20 mL of fresh medium. The microarrays (n = 2) were placed in a rectangular 4-well plate. 6 mL of the diluted bacteria culture ( $\sim 2 \times 10^8$  CFU/mL) was added to the polymer microarrays (the arrays were submerged in medium), and the microarrays were incubated overnight. For the anaerobic and microaerophilic strains, the 4-well plate was placed in a gas jar. Overnight cultures of bacteria in BacMix-1 were combined in equal amounts and then diluted fourfold with fresh media prior to incubation on the polymer microarrays. Bacteria in BacMix-2 were prepared similarly but were incubated on microarrays at 37 °C over 5 days, under microaerophilic conditions with agitation (30 rpm).

After incubation, polymer microarrays were washed gently with 6 mL of PBS, and bacteria stained with DAPI (1 µg/mL in PBS, 6mL/well) for 20 min. Subsequently, the polymer microarrays were washed with PBS (3 × 6 mL) and deionised water (1 × 6 mL), and then dried with a stream of air. A GeneFrame and coverslip (1.9 × 6.0 cm, AB-0630) were applied to each slide and sprayed with 1% Virkon.

## 1.3. Analysis of bacterial attachment

The polymer microarrays were analysed using a LaVision Bioanalyser 4F/4S scanner with a DAPI filter using an exposure time of 30 ms and an automated fluorescence microscope (with an X-Y-Z stage running Pathfinder<sup>TM</sup>, IMSTAR), which allowed capture of single images for each polymer spot. Brightfield and fluorescence channel (DAPI) were used for imaging under a ×20 objective.

Bacterial adhesion was evaluated *via* calculating the average fluorescence intensity of the quadruplicate polymer features after background correction. The population standard deviation of the eight features was also measured (four features for each polymer on the microarray, two microarrays used for each strain). Reproducibility between two identical microarrays was evaluated by a student t-test. Polymers with p-values < 0.001 and 6 degrees of freedom were considered statistically significant. Figures S1–S8 show bacteria repellence of the ‘hit’ polymer features on the polymer microarrays when compared to features with strong bacterial adhesion. Table S1 shows the comparison of fluorescence intensity from bacterial adhesion on ‘hit’ polymers and Table S2 the chemical composition of the ‘hit’ polymers.

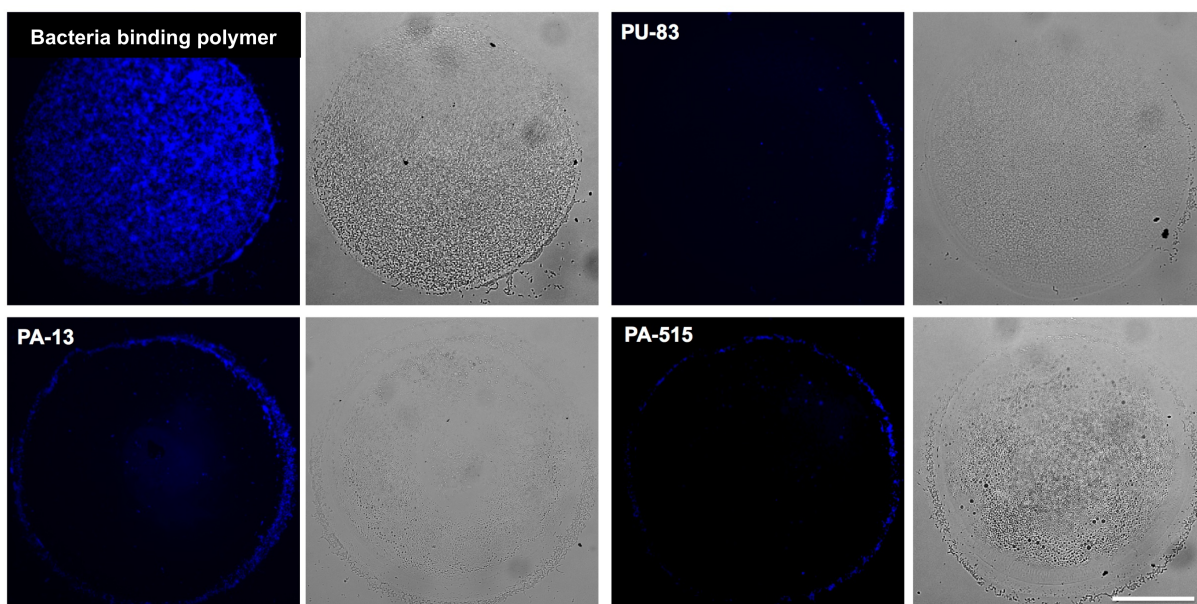

**Fig. S1** Fluorescence (DAPI channel) and brightfield microscopy images of *C jejuni* 11168 attachment on a representative polymer feature exhibiting strong bacteria binding and on the *C jejuni* 11168 non-binding polymers. Scale bar = 100  $\mu$ m.

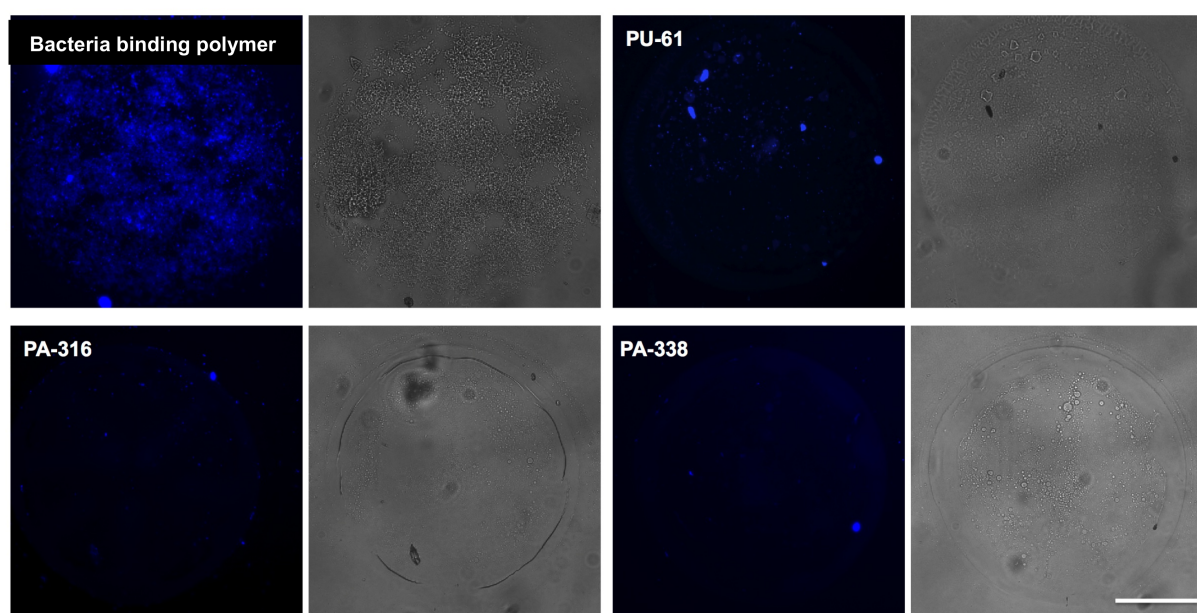

**Fig. S2** Fluorescence (DAPI) and brightfield microscopy images of *C jejuni* CH4 attachment on a representative polymer feature exhibiting strong bacteria binding and on *C jejuni* CH4 non-binding polymers. Scale bar = 100  $\mu$ m.

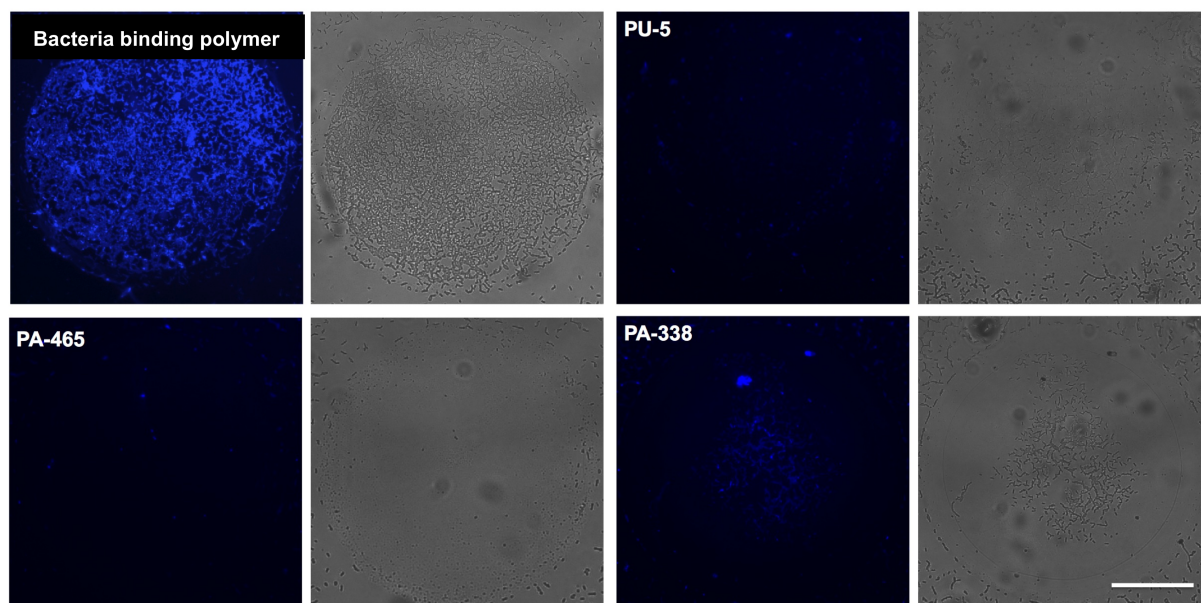

**Fig. S3** Fluorescence (DAPI) and brightfield microscopy images of *C. perfringens* on a representative polymer feature exhibiting strong bacteria binding and on the *C. perfringens* non-binding polymers. Scale bar = 100  $\mu$ m.

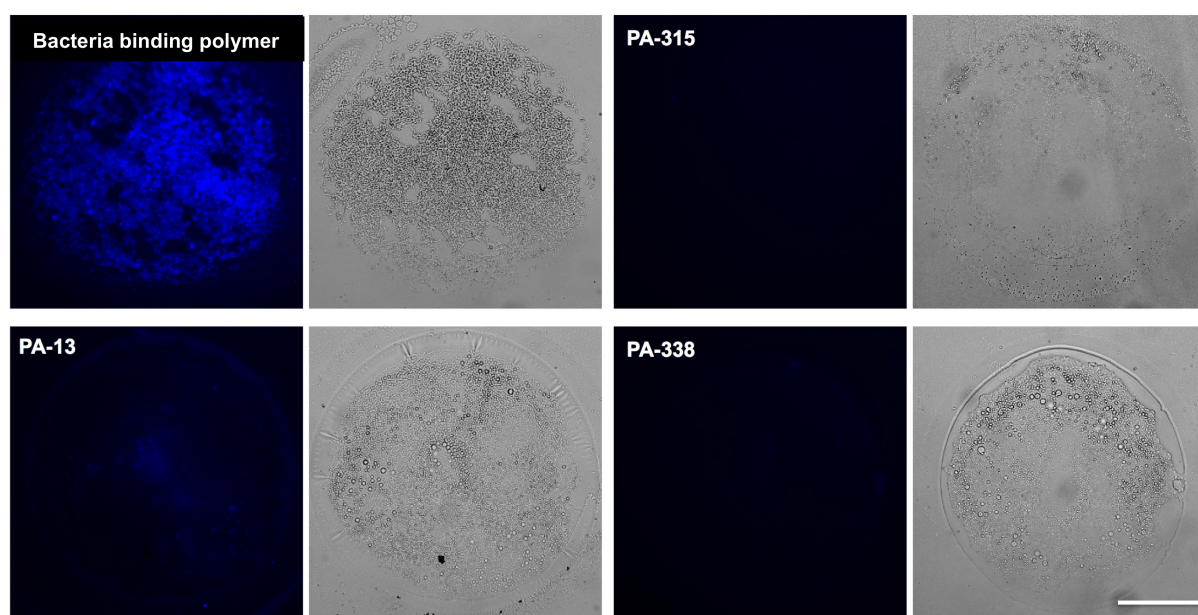

**Fig. S4** Fluorescence (DAPI) and brightfield microscopy images of *C. difficile* attachment on a representative polymer feature exhibiting strong bacteria binding and on *C. difficile* non-binding polymers. Scale bar = 100  $\mu$ m.



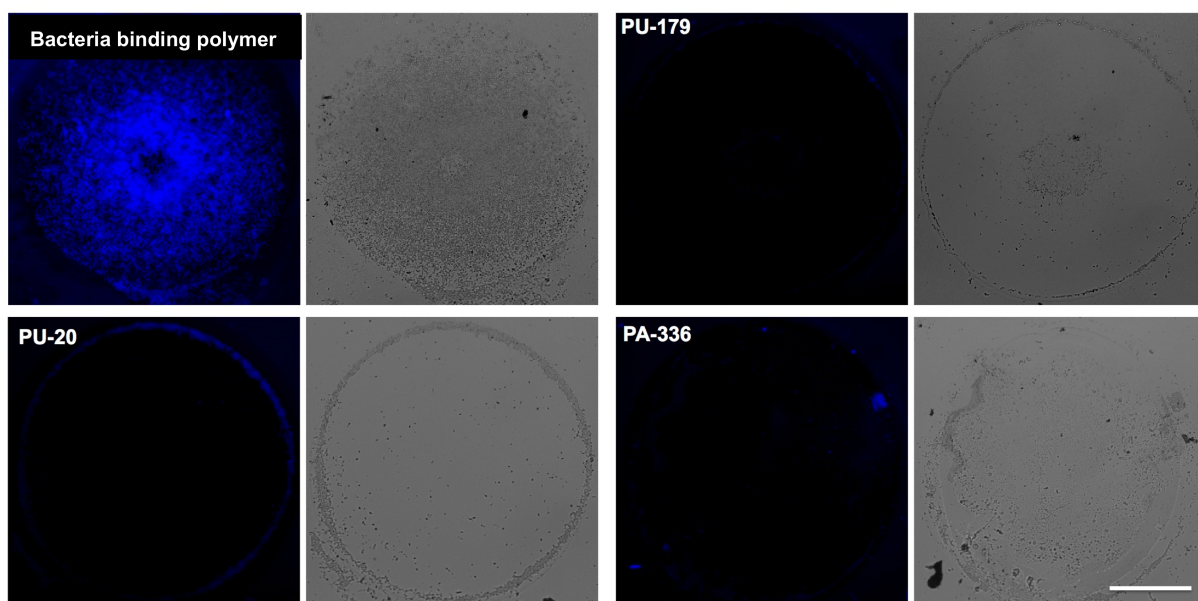

**Fig. S5** Fluorescence (DAPI) and brightfield microscopy images of *S. mutans* attachment on a representative polymer feature exhibiting strong bacteria binding and on *S. mutans* non-binding polymers. Scale bar = 100  $\mu$ m.

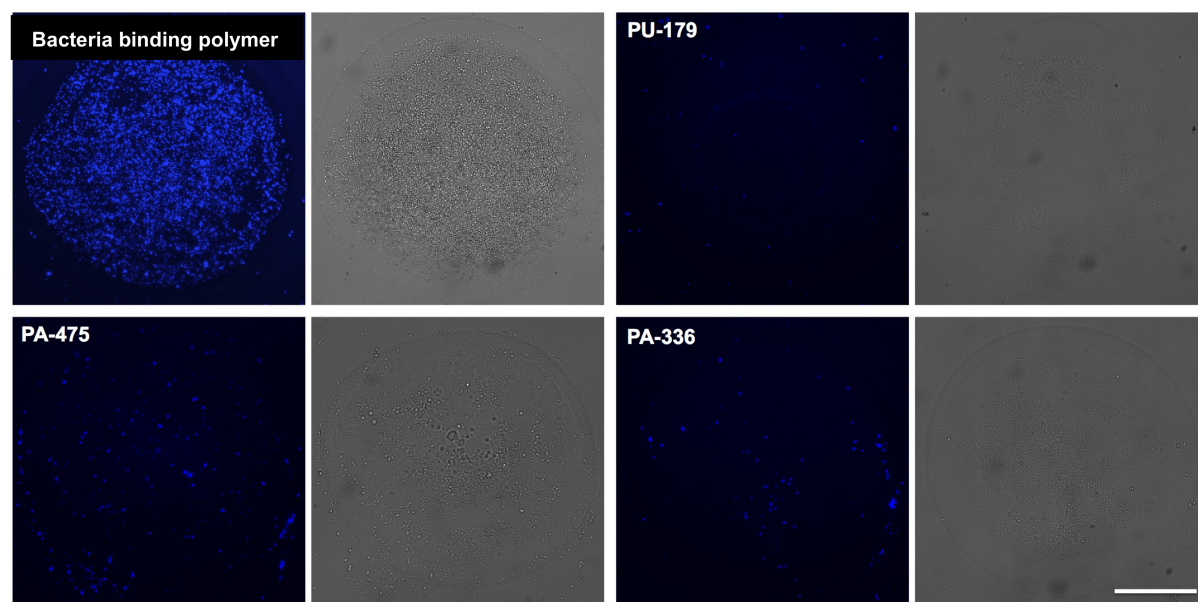

**Fig. S6** Fluorescence (DAPI) and brightfield microscopy images of BacMix-1 attachment on a representative polymer feature exhibiting strong bacteria binding and BacMix-1 non-binding polymers. Scale bar = 100  $\mu$ m.

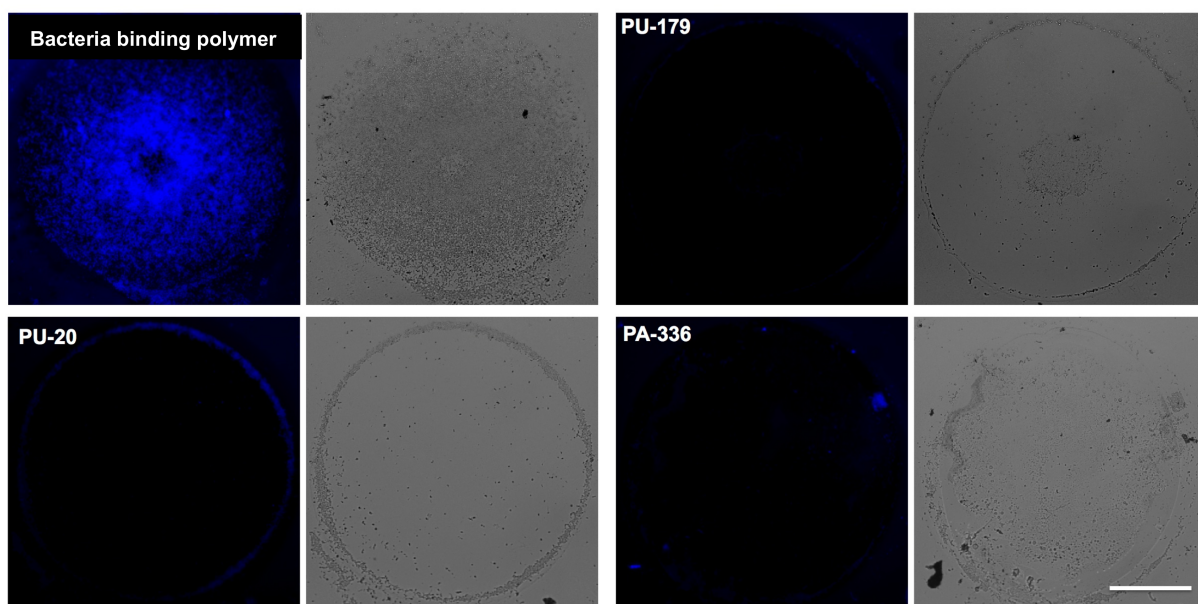

**Fig. S7** Fluorescence (DAPI) and brightfield microscopy images of BacMix-2 attachment on a representative polymer feature exhibiting strong bacteria binding and the BacMix-2 non-binding polymers. Scale bar = 100  $\mu\text{m}$ .

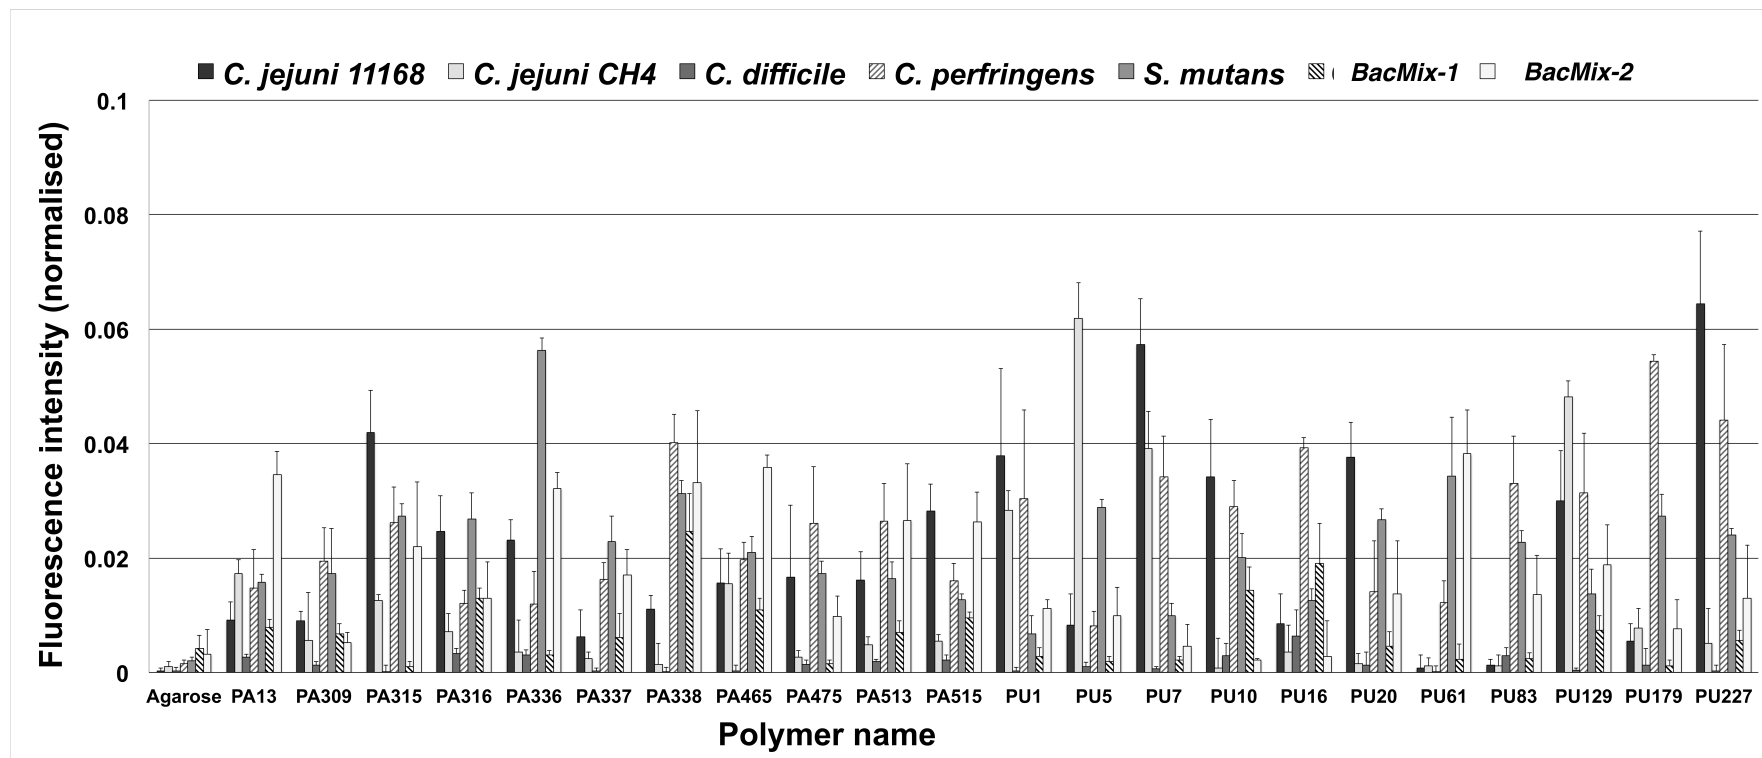

**Figure S8.** Polyacrylates/acrylamides (PA) and polyurethanes (PU) showing low binding of bacteria (*C. jejuni*, *C. difficile*, *C. perfringens*, *S. mutans*, and BacMix-1 and BacMix-2) expressed as background corrected mean DAPI fluorescence intensity (unit = arbitrary units).

**Table S1.** Analysis of bacterial adhesion on ‘hit’ polymers. Fluorescence intensity of DAPI stained bacteria on each polymer across bacteria strains and bacteria mixtures. Unit = arbitrary units (au)  $\times 10^4$ .

| Polymer | <i>C jejuni</i><br>11168 | <i>C jejuni</i><br>CH4 | <i>C perfringens</i> | <i>C difficile</i> | <i>S mutans</i> | BacMix-<br>1 | BacMix-<br>2 |
|---------|--------------------------|------------------------|----------------------|--------------------|-----------------|--------------|--------------|
| Agarose | 2                        | 10                     | 15                   | 3                  | 20              | 42           | 31           |
| PA13    | 90                       | 170                    | 14                   | 26                 | 150             | 79           | 350          |
| PA309   | 89                       | 56                     | 190                  | 12                 | 170             | 67           | 50           |
| PA315   | 410                      | 120                    | 260                  | 2                  | 270             | 10           | 210          |
| PA316   | 240                      | 71                     | 120                  | 32                 | 260             | 120          | 130          |
| PA336   | 230                      | 35                     | 110                  | 30                 | 560             | 30           | 320          |
| PA337   | 61                       | 24                     | 160                  | 3                  | 220             | 0            | 170          |
| PA338   | 110                      | 13                     | 400                  | 1                  | 310             | 240          | 330          |
| PA465   | 150                      | 150                    | 190                  | 3                  | 200             | 100          | 350          |
| PA475   | 160                      | 27                     | 260                  | 13                 | 170             | 14           | 100          |
| PA513   | 160                      | 48                     | 260                  | 19                 | 160             | 70           | 260          |
| PA515   | 280                      | 54                     | 150                  | 21                 | 120             | 95           | 260          |
| PU1     | 440                      | 440                    | 300                  | 3                  | 67              | 27           | 110          |
| PU5     | 83                       | 800                    | 81                   | 10                 | 120             | 18           | 98           |
| PU7     | 520                      | 160                    | 340                  | 6                  | 99              | 21           | 45           |
| PU10    | 340                      | 8                      | 140                  | 28                 | 200             | 140          | 20           |
| PU16    | 84                       | 35                     | 130                  | 63                 | 120             | 190          | 27           |
| PU20    | 370                      | 15                     | 140                  | 13                 | 260             | 45           | 130          |
| PU61    | 7                        | 11                     | 120                  | 0                  | 340             | 22           | 380          |
| PU83    | 12                       | 11                     | 330                  | 29                 | 220             | 23           | 130          |
| PU129   | 290                      | 270                    | 310                  | 4                  | 130             | 73           | 180          |
| PU179   | 55                       | 77                     | 110                  | 12                 | 270             | 12           | 76           |
| PU227   | 710                      | 510                    | 440                  | 2                  | 240             | 55           | 120          |



**Table S2.** Monomers and monomer ratios used in the synthesis of the bacteria non-binding ‘hit’ polymers.

| Polymer | Monomer 1    | Monomer 2 | Monomer 3 | Ratio of Monomers |     |     |
|---------|--------------|-----------|-----------|-------------------|-----|-----|
| PA465   | MEMA         | DEAEMA    | HEA       | 8.0               | 1.0 | 1.0 |
| PA475   | MEMA         | DEAEA     | HEMA      | 6.0               | 1.0 | 3.0 |
| PA513   | MEMA         | DEAEMA    | MMA       | 8.0               | 1.0 | 1.0 |
| PA515   | MEMA         | DEAEA     | MMA       | 6.0               | 1.0 | 3.0 |
| PA13    | MMA          | DMAA      | -         | 9.0               | 1.0 | -   |
| PU1     | PEG2000      | HDI       | -         | 4.9               | 5.2 | -   |
| PU16    | PEG2000      | MDI       | -         | 4.9               | 5.2 | -   |
| PU161   | PEG2000      | MDI       | BD        | 2.5               | 5.2 | 2.3 |
| PU7     | PEG900       | BICH      | -         | 4.9               | 5.2 | -   |
| PU83    | PEG900       | HMDI      | BD        | 2.5               | 5.2 | 2.3 |
| PU227   | PPG-PEG-1900 | HDI       | -         | 4.9               | 5.2 | -   |
| PU129   | PPG425       | BICH      | DMAPD     | 2.5               | 5.2 | 2.3 |
| PU10    | PTMG2000     | BICH      | -         | 4.9               | 5.2 | -   |
| PU179   | PTMG2000     | HDI       | NMAPD     | 2.5               | 5.2 | 2.3 |
| PU20    | PTMG2000     | MDI       | -         | 4.9               | 5.2 | -   |
| PU5     | PTMG2000     | HDI       | -         | 4.9               | 5.2 | -   |

#### Abbreviations

|        |                                          |
|--------|------------------------------------------|
| MEMA   | 2-methoxyethylmethacrylate               |
| HEMA   | 2-hydroxyethylmethacrylate               |
| HEA    | 2-hydroxyethylacrylate                   |
| MMA    | methyl methacrylate                      |
| DMAA   | dimethylacrylamide                       |
| DEAEA  | 2-(diethylamino)ethyl acrylate           |
| DEAEMA | 2-(diethylamino)ethyl methacrylate       |
| PEG    | poly(ethyleneglycol)                     |
| PPG    | poly(propyleneglycol)                    |
| PTMG   | poly(butyleneglycol)                     |
| HDI    | 1,6-diisocyanatohexane                   |
| MDI    | 4,4'-methylenebis(phenylisocyanate)      |
| BICH   | 1,3-bis(isocyanatomethyl)cyclohexane     |
| HMDI   | 4,4'-Methylenebis(cyclohexyl isocyanate) |
| BD     | 1,4-butanediol                           |
| EG     | ethylene glycol                          |
| DMAPD  | 3-dimethylamino-1,2-propanediol          |
| NMPD   | 2-nitro-2-methyl-1,3-propanediol         |

**Table S3.** Polyacrylates/acrylamides that were functionalised post-polymerisation via a reaction between an epoxy group in GMA and various amines (GMA = glycidyl methacrylate).

| Polymer | MMA/GMA ratio | Fuctionalisation amine   |
|---------|---------------|--------------------------|
| PA309   | 9:1           | Di- <i>n</i> -hexylamine |
| PA315   | 9:1           | Dibenzylamine            |
| PA316   | 7:3           | Dibenzylamine            |
| PA336   | 9:1           | <i>N</i> -methylaniline  |
| PA337   | 7:3           | <i>N</i> -methylaniline  |
| PA338   | 1:1           | <i>N</i> -methylaniline  |

## 2. Scale-up and validation of ‘hit’ polymers

Polymers were spin-coated onto circular glass coverslips ( $\varnothing$  13 mm), placed on 24-well plates, and incubated with BacMix-1 and BacMix-2 as described earlier (section 1.2), and imaged by fluorescence microscopy and scanning electron microscopy (SEM). Uncoated coverslips and agarose coated coverslips were used as controls.

### Scanning electron microscopy

After incubation with bacteria, uncoated and coated coverslips were washed twice with 0.1 M cacodylate buffer (pH 7.4) and then fixed with 2.5% (w/v) glutaraldehyde in 0.1 M cacodylate buffer (pH 7.4) for 2 h. Samples were post-fixed with 1% (w/v) osmium tetroxide for 1 hour at room temperature, dehydrated stepwise with ethanol (50, 70, 90 and 100% (v/v)), critical point dried in CO<sub>2</sub>, and gold coated by sputtering. The samples were examined with a Philips XL30CP Scanning Electron Microscope. Figure S9 and S10 show the SEM images of bacteria binding / non-binding on the surfaces.

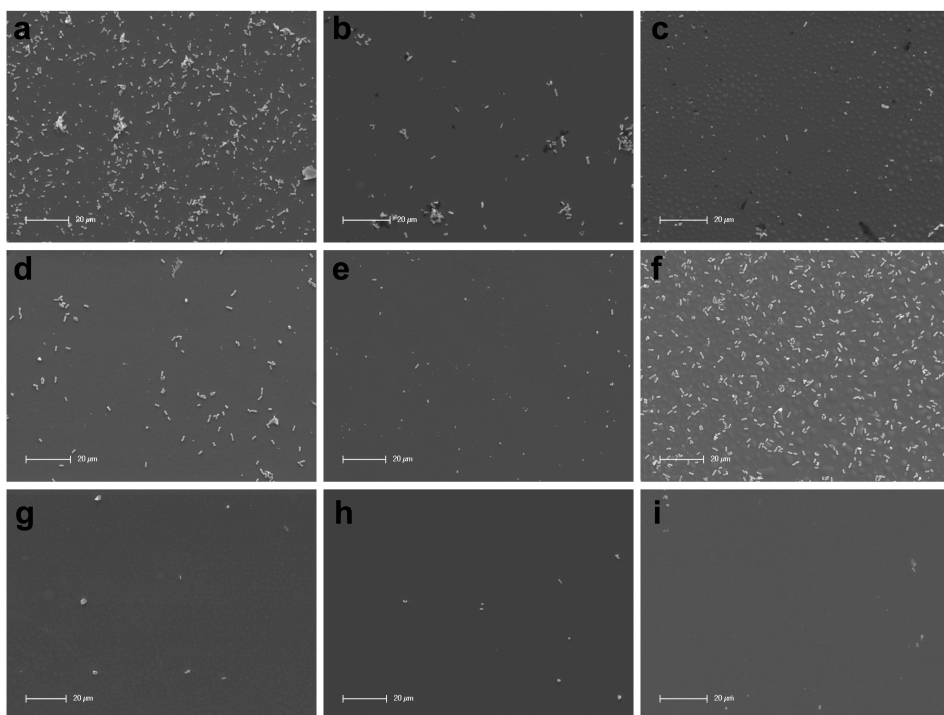

**Fig. S9** SEM images of the coated/uncoated coverslips after incubation with BacMix-1. (a) uncoated (glass); (b) **PA338**; (c) **PA515**; (d) agarose; (e); **PU5** (f) **PU20**; (g) **PA13**; (h) **PU83**; (i) **PU179**. Scale bar = 20 µm.

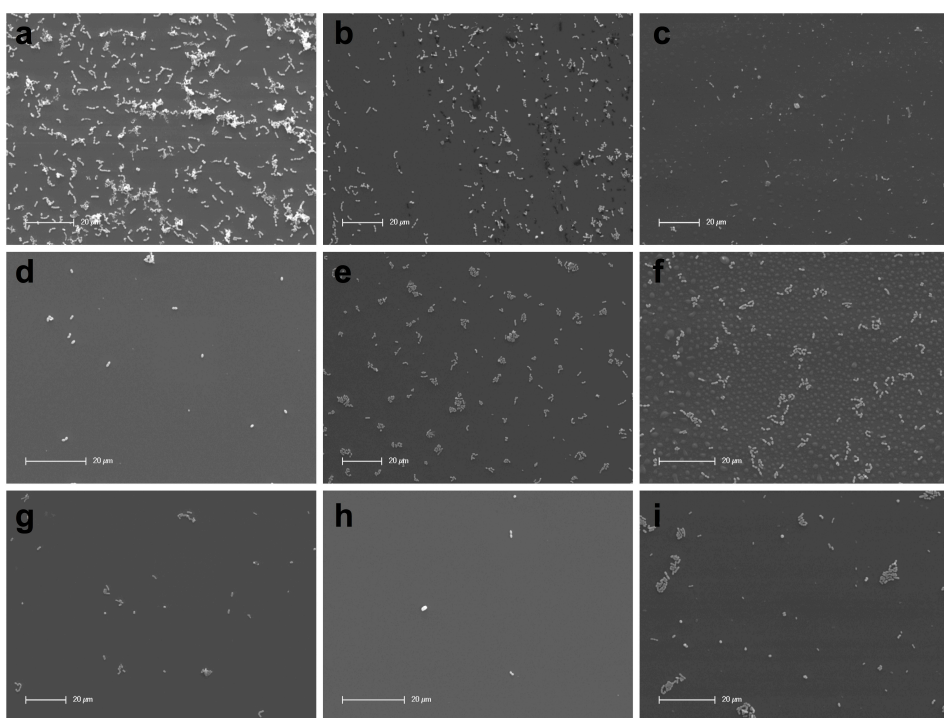

**Fig. S10** SEM images of the coated/uncoated coverslips after incubation with BacMix-2. (a) uncoated (glass); (b) **PA338**; (c) **PA515**; (d) agarose; (e); **PU5** (f) **PU20**; (g) **PA13**; (h) **PU83**; (i) **PU179**. Scale bar = 20 µm.

### 3. Coating of catheters

#### 3.1 Polymer synthesis and characterisation

For coating of the catheters, **PA13**, **PA515** and **PA155** were resynthesised by free-radical polymerisation, using 2,2'-azobis(2-methylpropionitrile) (AIBN) as an initiator. Reaction conditions for each polymer are summarised in Table S4. The monomers, AIBN and the solvent were added to a glass vessel, and polymerisation carried out for 48 h under N<sub>2</sub> atm. The polymers were precipitated by dropwise addition into hexane (**PA13** and **PA515**) or 50% Et<sub>2</sub>O–hexane (**PA155**), collected by filtration, washed with the solvent, and dried overnight *in vacuo* at 40 °C. The polymers were characterised by GPC (Table S5) and IR (Fig. S11).

**Table S4.** Synthesis of **PA155**, **PA515** and **PA13**.

| Polymer      | Monomers               |                           |                      | AIBN<br>(mmol) | Solvent        | T (°C) | Yield<br>% |
|--------------|------------------------|---------------------------|----------------------|----------------|----------------|--------|------------|
| <b>PA13</b>  | <b>MMA</b><br>36 mmol  | <b>DMAA</b><br>4 mmol     | –                    | 0.100          | Toluene (4 mL) | 60     | 88         |
| <b>PA515</b> | <b>MEMA</b><br>18 mmol | <b>DEAEA</b><br>3 mmol    | <b>MMA</b><br>9 mmol | 0.075          | Toluene (6 mL) | 60     | 84         |
| <b>PA155</b> | <b>HEMA</b><br>4 mmol  | <b>DMAEMA</b><br>3.5 mmol | –                    | 0.008          | DMF (19 mL)    | 80     | 54         |

**Table S5.** Molecular weight (M<sub>w</sub> and M<sub>n</sub>) and polydispersity index (PDI) of the polyacrylates/acrylamides **PA155**, **PA515** and **PA13**.

| Polymer      | M <sub>w</sub> | M <sub>n</sub> | PDI |
|--------------|----------------|----------------|-----|
| <b>PA13</b>  | 411000         | 121000         | 3.4 |
| <b>PA515</b> | 90000          | 33500          | 2.4 |
| <b>PA155</b> | 9450           | 7910           | 1.2 |

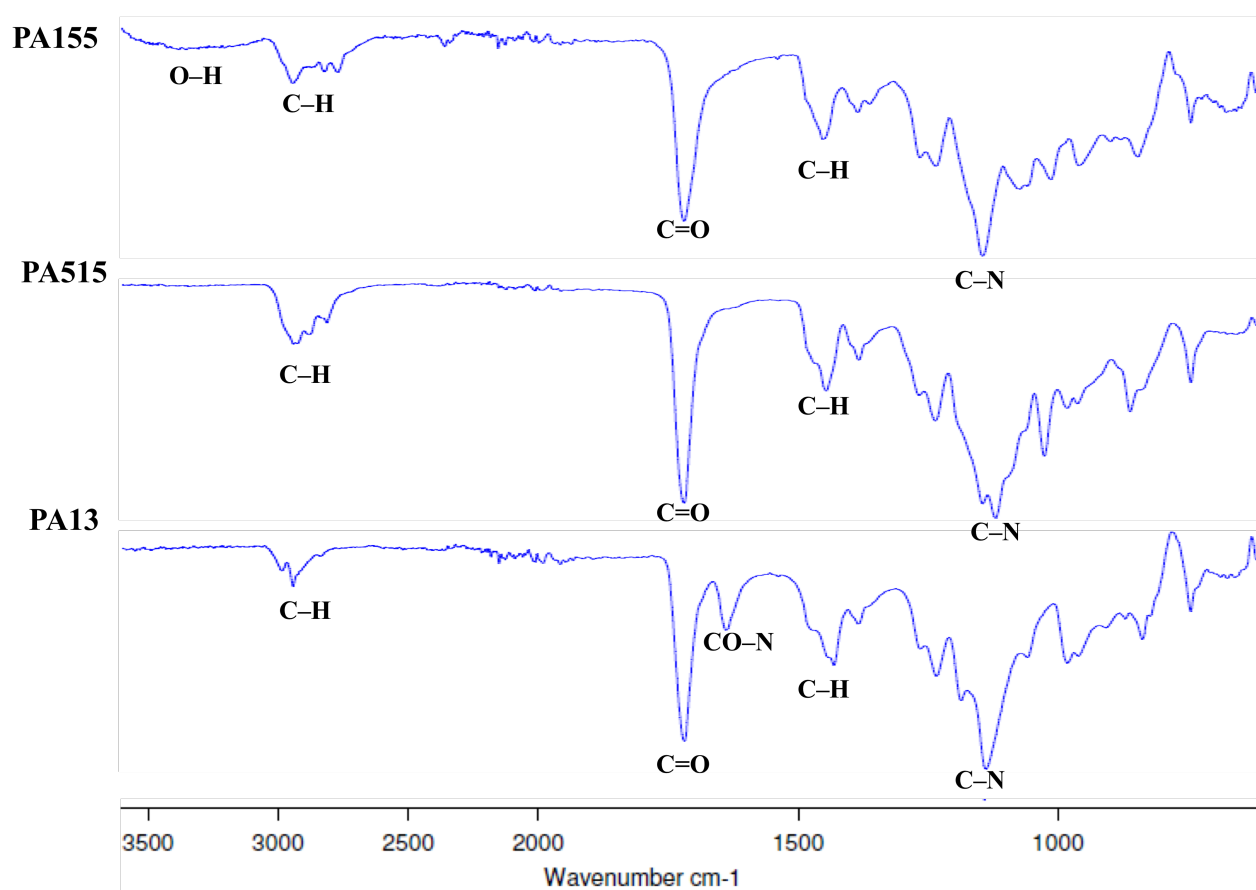

**Fig. S11** FT-IR spectra of **PA155**, **PA515** and **PA13**.

### 3.2 Stability and solubility of the catheters in organic solvents

Indwelling parts of **Cath-1** (Arrow International CS12123E) and **Cath-2** (Baxter Healthcare Corporation ECS1320) were cut into small cylindrical pieces along their length with a razor blade, and measured with a digital Vernier. Average length of the catheter pieces was found to be  $5.10 \pm 0.42$  mm for **Cath-1** ( $n = 36$ ) and  $5.05 \pm 0.45$  mm for **Cath-2** ( $n = 71$ ).

Solvents evaluated included acetic acid, ammonia, acetone, acetonitrile, diethyl ether, tetrahydrofuran (THF), dimethylformamide (DMF), *N*-methyl-2-pyrrolidone (NMP), ethanol, methanol, ethylene glycol, toluene and xylene. Catheter pieces were immersed in the solvents, left for 12 hours, and evaluated visually (Fig. S12). Acetic acid, DMF, THF and NMP caused **Cath-1** to swell or disintegrate or resulted in cloudy solvent. **Cath-2** exhibited good resistance to the solvents tested. Acetone was found to be benign for both catheters.

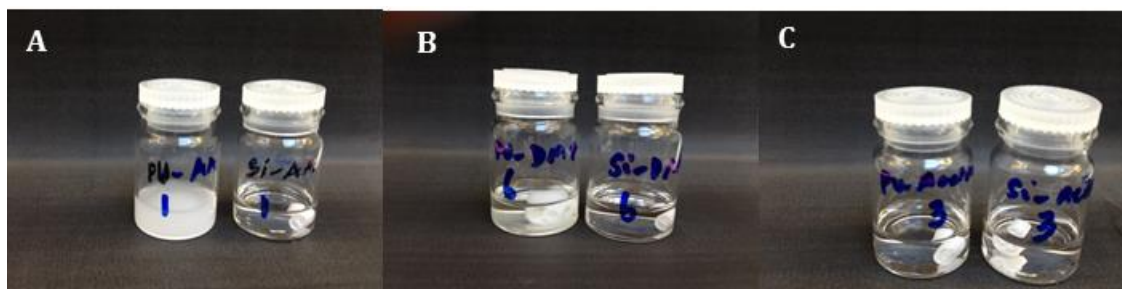

**Fig. S12** Stability test of catheters in various solvents (A) **Cath-1** (left) and **Cath-2** (right) in acetic acid. (B) **Cath-1** (left) and **Cath-2** (right) in DMF. (C) **Cath-1** (left) and **Cath-2** (right) in acetone.

**IR Analysis.** Pieces of **Cath-1** and **Cath-2** were placed in acetone for 12 h. For **Cath-1** there was no evidence for the elution of urethane containing components ( $\sim 1700 \text{ cm}^{-1}$ ). For **Cath-2**, the IR spectra showed no bands in the mid-infrared spectrum range where silicones exhibit strong absorption bands.

### 3.3 Thickness of the coating

The catheters **Cath-1** and **Cath-2** were coated with 10% solution of **PA13** in acetone, cut, and the thickness of the polymer coating measured by SEM (FEI Quanta 3D FEG) (Fig. S13).

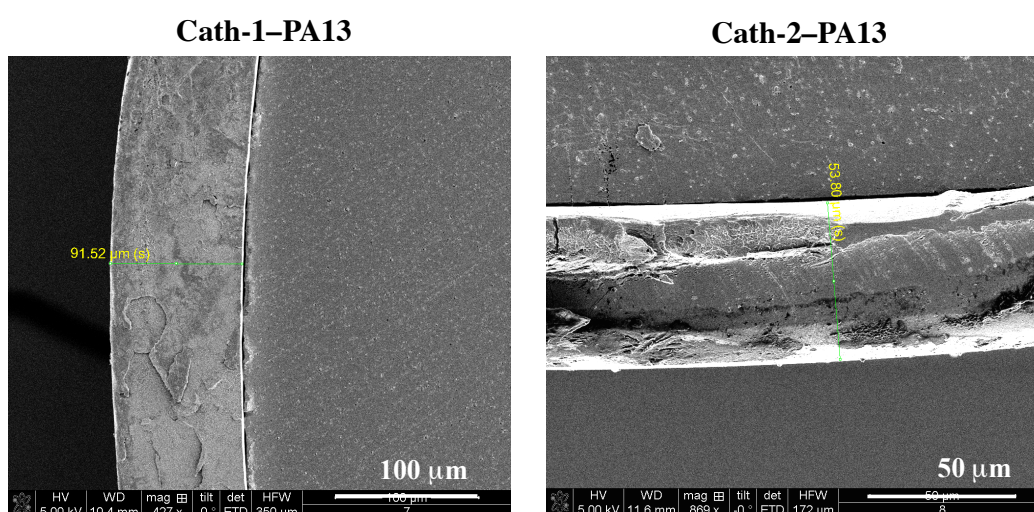

**Fig. S13.** SEM (FEI Quanta 3D FEG) images showing the polymer coating on the catheter surfaces.

## 4. Bacteria binding studies on coated catheters

### 4.1 Confocal microscopy and image analysis

Confocal imaging was performed on a Leica SP5 confocal microscope (405nm blue diode laser set at 10%. Emitted fluorescence was detected using a hybrid detector, with filter a range of 414 to 502 nm, Pin hole – Airy1, Image Size –  $1024 \times 1024$  pixels, Voxel width – 105.2nm. Z stack were produced using 0.5 $\mu$ m spacing. Magnification –  $40 \times$  1.25 Oil UV). Confocal imaging was completed through z-stacking 50 images across 100  $\mu$ m length of the catheter. Confocal images were analysed using Image-pro plus 7.0. The z-stacked images were flattened in the z plane using the function ‘extended depth of field’, to create a single image of a catheter piece. This image was then analysed to obtain the area of the catheter covered by bacteria. The total area of the image was approximately  $100 \times 100 \mu$ m. Images were background corrected using the ‘flatten background’ function within Image-pro.

### 4.2 SEM images of Cath-1–PA13 with BacMix-1

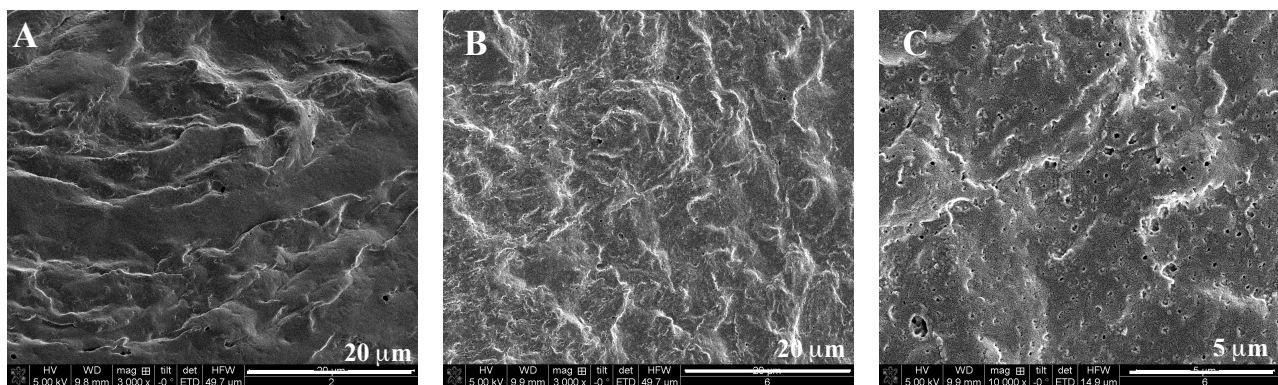

**Fig. S14.** SEM images (FEI Quanta 3D FEG) of **Cath-1–PA13**. (A) No bacteria, scale bar 20  $\mu$ m; (B) Incubated with BacMix-1, scale bar 20  $\mu$ m; (C) Incubated with BacMix-1, scale bar 5  $\mu$ m.

## 5. References

1. G. Tourniaire, J. Collins, S. Campbell, H. Mizomoto, S. Ogawa, J.-F. Thaburet and M. Bradley, *Chem. Commun.*, 2006, 2118–2120.
2. A. Hansen, PhD thesis, University of Edinburgh, Edinburgh, June 2012.
3. S. Pernagallo, J. J. Diaz-Mochon and M. Bradley, *Lab Chip*, 2009, **9**, 397–403.
